# Supplementary material for: Fabrication of triple responsive polymer brushes and their catalytic performance after loading palladium
Source: Royal Society of Chemistry journal article supplement (doi:10.1039/c5ra13245b), 2015-01-01
Supplement: c5ra13245b1.pdf [file c5ra13245b1.pdf]

## Supporting Information for

### **Fabrication of triple responsive polymer brushes and their catalytic performance after loading palladium**

**Hui Liu<sup>a\*</sup>, Si Chen<sup>a</sup>, Huanqing Cui<sup>b</sup>, Jin Hu<sup>a</sup>, Hongyan Cai<sup>a</sup>, and Wenkai Deng<sup>a</sup>**

*<sup>a</sup>College of Chemistry and Chemical Engineering, Central South University, South Lushan Road, Changsha 410083, P.R. China.*

*<sup>b</sup>Shenzhen Institutes of Advanced Technology, Chinese Academy of Sciences, Shenzhen 518055, P.R. China.*

\*Corresponding author:

Hui Liu (E-mail: [liuhui@csu.edu.cn](mailto:liuhui@csu.edu.cn))

Tel: +86 731 88876605

Fax: +86 731 88879616

Postal address: College of Chemistry and Chemical Engineering, Central South University, 932 South Lushan Road, Changsha, 410083, P. R. China.

## Experimental

### *Synthesis of photosensitive monomer SPMA*

The materials to synthesize the 1'-(2-acryloxyethyl)-3',3'-dimethyl-6-nitrospiro-(2H-1-benzopyran-2,2'-indoline) (SPMA) included photochromic spiropyran 1'-(2-hydroxyethyl)-3',3'-dimethyl-6-nitrospiro[2H-1-benzopyran-2,2'-indoline] (SP-OH, >93%, TCI), acryloyl chloride (99%, Aladdin), triethylamine (TEA, 99%, Aladdin), and tetrahydrofuran (THF, anhydrous, >99.9%, Aladdin). The methods were described in the literatures<sup>[1-4]</sup> and the SPMA was prepared as demonstrated in Scheme S1. The successful synthesis of the light-responsive monomer is confirmed by <sup>1</sup>H NMR spectroscopy (see Fig. S1) and the following peaks were identified of the as-synthesized monomer (500 MHz, CDCl<sub>3</sub>): δ 8.01 (m, 2H), 7.22 (m, 1H), 7.10 (d, J = 7.2 Hz, 1H), 6.90 (m, 2H), 6.75 (d, J = 8.8 Hz, 1H), 6.70 (d, J = 7.8 Hz, 1H), 6.38 (dd, J = 17.3, 1.1 Hz, 1H), 6.06 (dd, J = 17.3, 10.5 Hz, 1H), 5.87 (d, J = 10.4 Hz, 1H), 5.83 (dd, J = 10.5, 1.1 Hz, 1H), 4.31 (m, 2H), 3.59–3.40 (m, 2H), 1.28 (s, 3H), 1.16 (s, 3H).

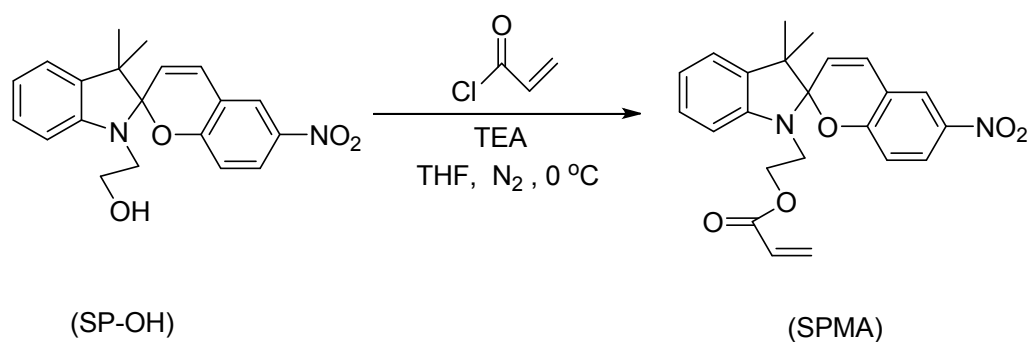

**Scheme S1** The synthetic route of photo-responsive monomer (SPMA).

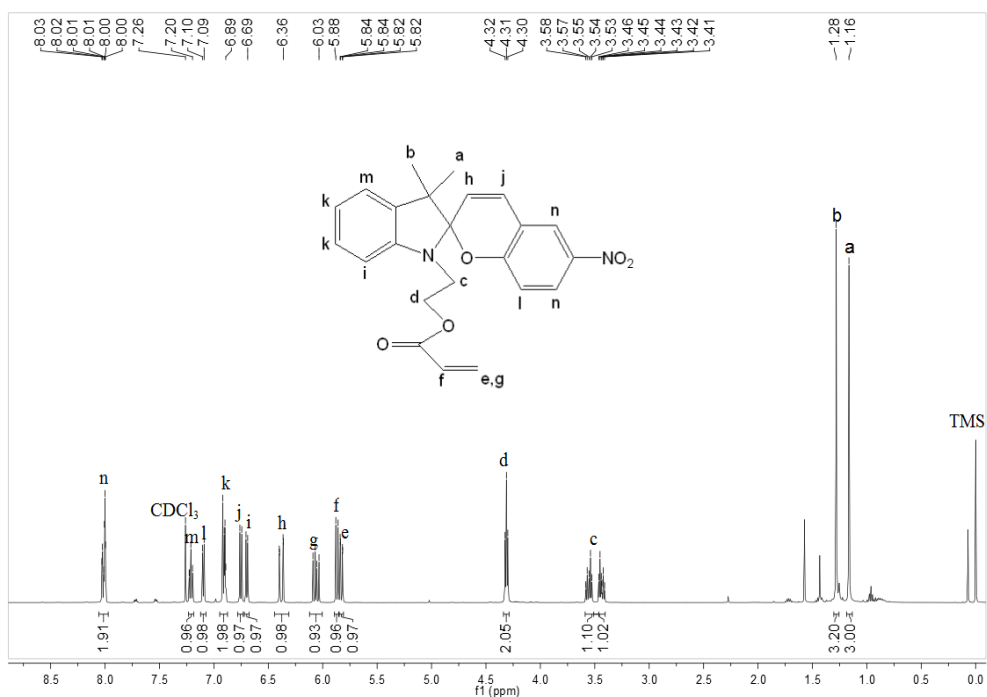

Fig. S1 <sup>1</sup>H NMR spectrum (in CDCl<sub>3</sub>) of photo-responsive monomer (SPMA).

## Results and Discussion

### *pH-induced shrinking/swelling of SiO<sub>2</sub>-g-P(SPMA-co-DMAEMA)*

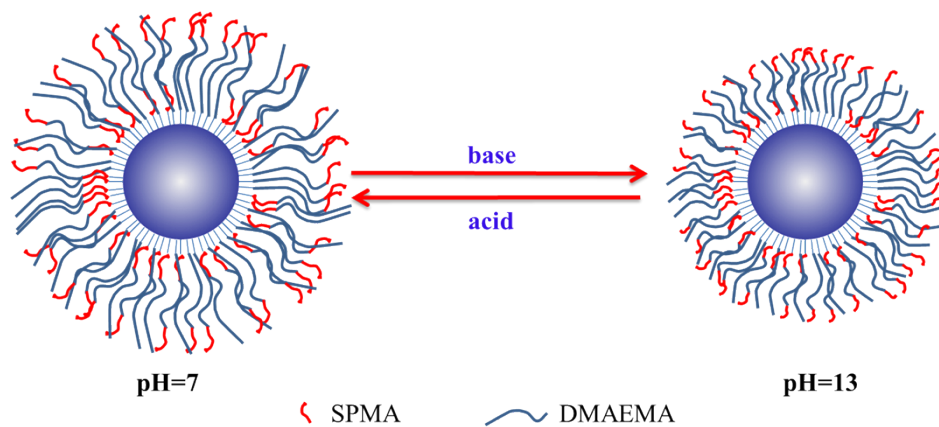

Scheme S2 Schematic illustration of the reversible pH-tunable swelling/shrinking transition.

### *Photo-responsive behaviors of SiO<sub>2</sub>-g-P(SPMA-co-DMAEMA)*

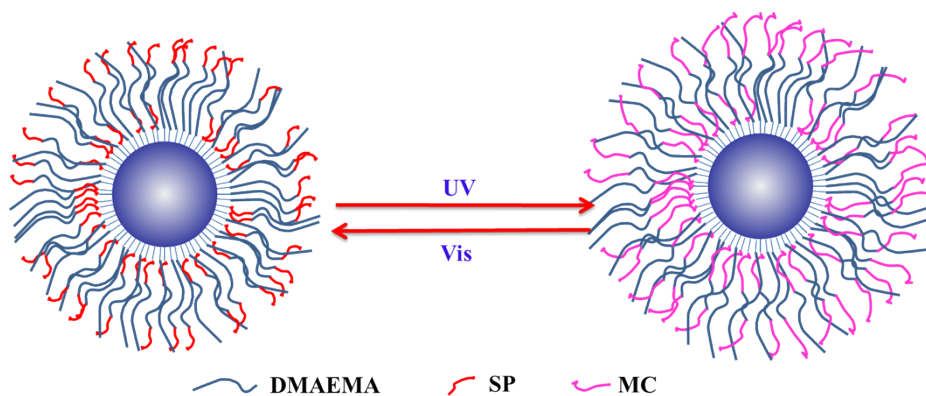

**Scheme S3** Schematic illustration of the photo-responsive transition. SP is the colorless, nonpolar, and hydrophobic spiropyran molecule, and MC is the colored, polar, hydrophilic, and zwitterionic merocyanine molecule.

## References

- 1 Y. Wang, C. Y. Hong and C. Y. Pan, *Biomacromolecules*, 2012, **13**, 2585.
- 2 T. Wu, G. Zou, J. Hu and S. Liu, *Chem. Mater.*, 2009, **21**, 3788.
- 3 F. M. Raymo and S. Giordani, *J. Am. Chem. Soc.*, 2001, **123**, 4651.
- 4 C. Li, Y. Zhang, J. Hu, J. Cheng and S. Liu, *Angew. Chem. Int. Ed.*, 2010, **49**, 5120.
